# Supplementary material for: Unfavorable Mortality-To-Incidence Ratio of Lung Cancer Is Associated with Health Care Disparity
Source: PubMed Central journal article supplement (PMC6313465; doi:10.3390/ijerph15122889), 2018-12-17
Supplement: ijerph-15-02889-s001.pdf [file ijerph-15-02889-s001.pdf]

# Supplementary Materials: Unfavorable Mortality-To-Incidence Ratio of Lung Cancer is Associated with Health Care Disparity

Cheng-Yu Hua, Kwong-Kwok Au, Sung-Lang Chen, Shao-Chuan Wang, Chi-Yu Liao, Hui-Hsiang Hsu, Wen-Wei Sung \*and Yao-Chen Wang \*

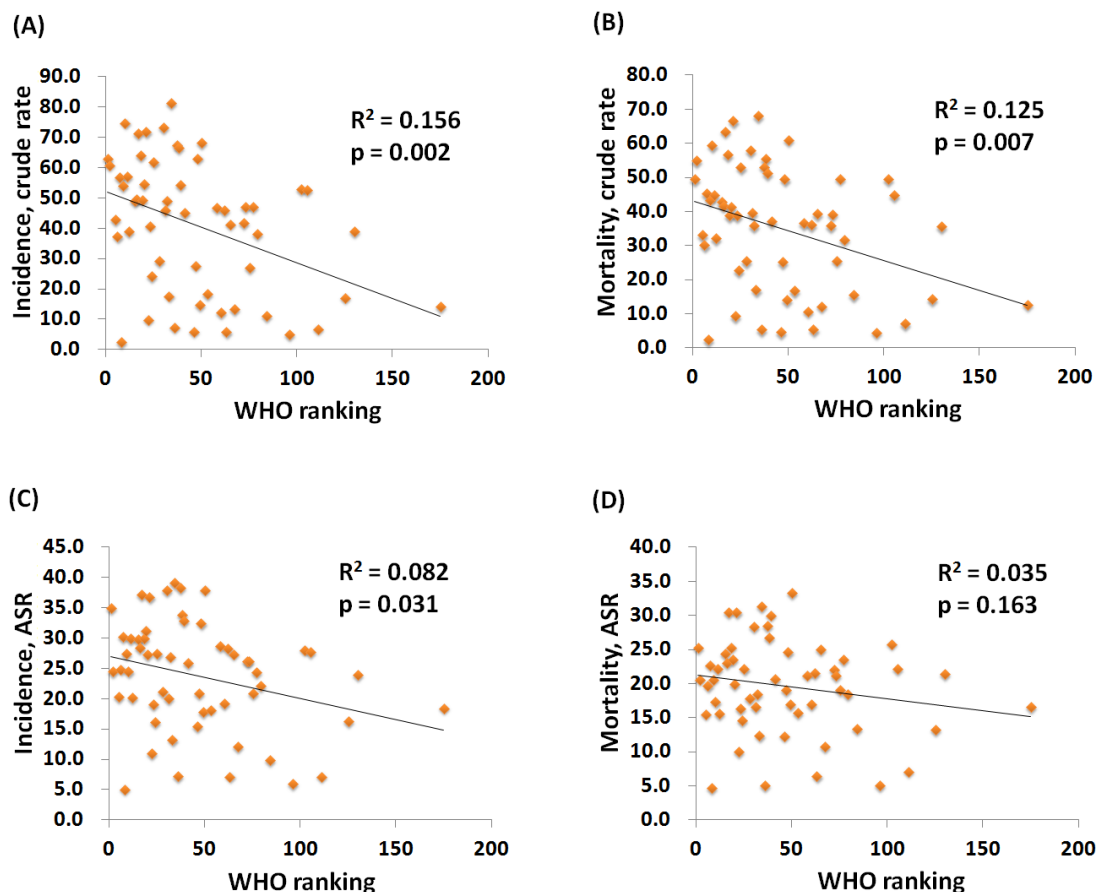

**Figure S1.** Countries with good World Health Organization rankings have high crude rates of (A) incidence, and (B) mortality, as well as high age-standardized rates (ASR) of (C) incidence. The association between World Health Organization rankings and the ASR of (D) mortality was not statistically significant.

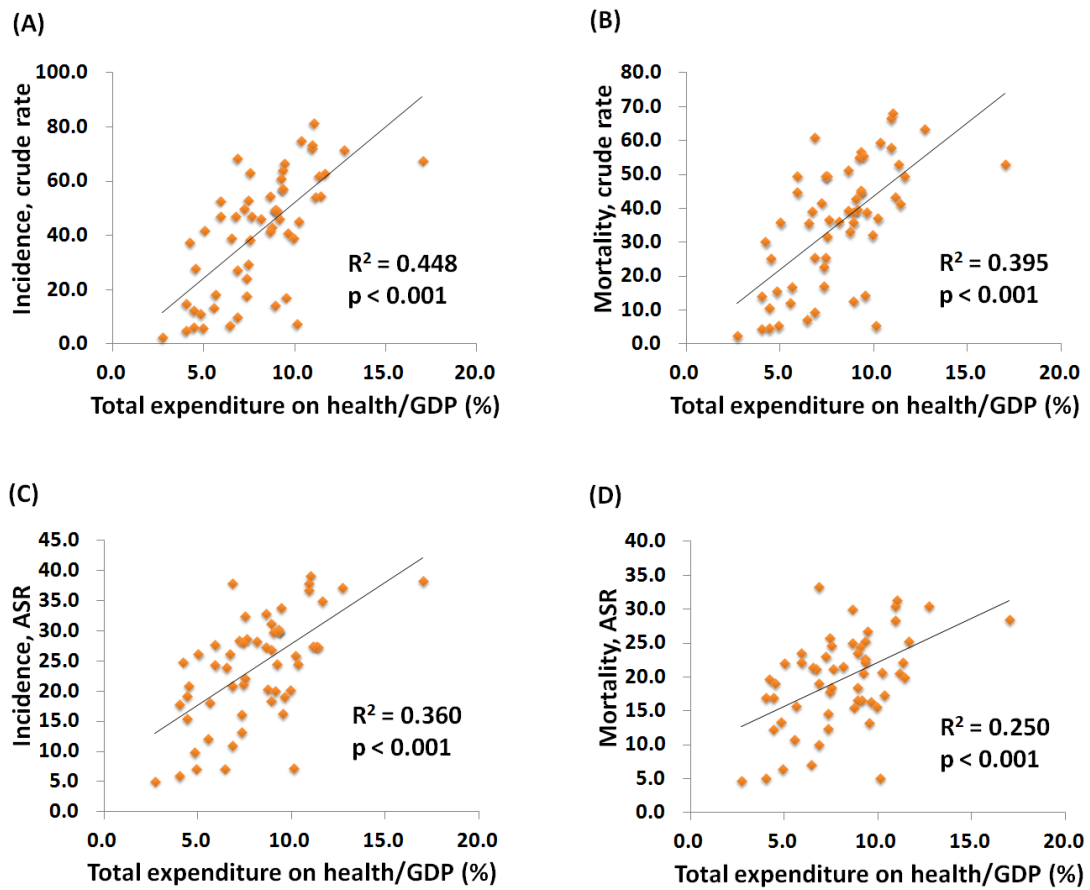

**Figure S2.** Countries with good World Health Organization rankings have high crude rates of (A) incidence, and (B) mortality, as well as high age-standardized rates (ASR) of (C) incidence, and (D) mortality.

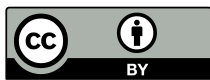

© 2018 by the authors. Submitted for possible open access publication under the terms and conditions of the Creative Commons Attribution (CC BY) license (<http://creativecommons.org/licenses/by/4.0/>).
